# Supplementary material
Source: MDPI journal article supplement (https://www.mdpi.com/2073-4352/13/9/1399)
Supplement: s1 [file s1]

**Table S1.** EPMA date for " Jin Gao Yu " (wt.%)

| Data   | Na <sub>2</sub> O | Cr <sub>2</sub> O <sub>3</sub> | SiO <sub>2</sub> | MnO  | MgO   | FeO  | SrO  | CoO  | Al <sub>2</sub> O <sub>3</sub> | NiO  | CaO   | CuO  | BaO  | ZnO  | PbO <sub>2</sub> | F | TiO <sub>2</sub> | K <sub>2</sub> O | Total | Chemical Formula                                                                         |
|--------|-------------------|--------------------------------|------------------|------|-------|------|------|------|--------------------------------|------|-------|------|------|------|------------------|---|------------------|------------------|-------|------------------------------------------------------------------------------------------|
| JGY1-1 | 0.01              | -                              | 0.05             | 0.08 | 21.28 | 2.25 | -    | -    | 0.04                           | -    | 27.86 | -    | -    | 0.01 | -                | - | -                | -                | 51.58 | Ca <sub>0.94</sub> Mg <sub>1.00</sub> Fe <sub>0.60</sub> (CO <sub>3</sub> ) <sub>2</sub> |
| JGY1-2 | 0.01              | 0.01                           | 0.02             | 0.06 | 21.02 | 2.37 | -    | -    | 0.05                           | -    | 28.16 | -    | 0.01 | 0.11 | -                | - | -                | -                | 51.82 | Ca <sub>0.95</sub> Mg <sub>0.99</sub> Fe <sub>0.60</sub> (CO <sub>3</sub> ) <sub>2</sub> |
| JGY1-3 | 0.03              | -                              | 0.04             | 0.02 | 22.01 | 0.36 | -    | 0.02 | 0.03                           | -    | 29.75 | -    | 0.02 | 0.10 | -                | - | -                | -                | 52.38 | Ca <sub>0.98</sub> Mg <sub>1.01</sub> Fe <sub>0.10</sub> (CO <sub>3</sub> ) <sub>2</sub> |
| JGY2-1 | 0.03              | -                              | 0.07             | -    | 22.73 | 0.19 | 0.03 | -    | 0.02                           | 0.02 | 29.83 | 0.00 | -    | 0.05 | 0.00             | - | -                | -                | 52.97 | Ca <sub>0.97</sub> Mg <sub>1.03</sub> (CO <sub>3</sub> ) <sub>2</sub>                    |
| JGY3-1 | 0.02              | 0.01                           | 0.03             | -    | 20.72 | 1.99 | 0.07 | 0.01 | -                              | -    | 29.40 | 0.06 | 0.02 | 0.03 | -                | - | -                | -                | 52.36 | Ca <sub>0.98</sub> Mg <sub>0.97</sub> Fe <sub>0.05</sub> (CO <sub>3</sub> ) <sub>2</sub> |
